# Supplementary material for: An MXene-based aerogel with cobalt nanoparticles as an efficient sulfur host for room-temperature Na–S batteries
Source: Royal Society of Chemistry journal article supplement (doi:10.1039/d0qi00939c), 2020-01-01
Supplement: d0qi00939c1.pdf [file d0qi00939c1.pdf]

## Electronic Supplementary Information

### **MXene-based aerogel with cobalt nanoparticles as an efficient sulfur host for room-temperature Na-S batteries**

Qiuju Yang<sup>a,b</sup>, Tingting Yang<sup>a,b</sup>, Wei Gao<sup>a,b</sup>, Yuruo Qi<sup>\*a,b</sup>, Bingshu Guo<sup>a,b</sup>, Wei Zhong<sup>a,b</sup>, Jian Jiang<sup>a,b</sup> and Maowen Xu<sup>\*a,b</sup>

<sup>a</sup> Key Laboratory of Luminescent and Real Time Analytical Chemistry (Southwest University), Ministry of Education, School of Materials and Energy, Southwest University, Chongqing 400715, P. R. China;

<sup>b</sup> Chongqing Key Lab for Advanced Materials and Clean Energies of Technologies, School of Materials and Energy, Southwest University, Chongqing, 400715, P.R. China.

E-mail: [qiyurujy@swu.edu.cn](mailto:qiyurujy@swu.edu.cn); [xumaowen@swu.edu.cn](mailto:xumaowen@swu.edu.cn)

## **1. Material characterization**

The morphologies and structures of the prepared aerogels were examined by FESEM (JSM-7800F, Japan) and TEM (JEM-2100, Japan). EDS mapping was used to analyze the elemental composition and distribution of the product. The crystal structures were recorded through XRD (MAXima-X XRD-7000, Cu K $\alpha$  radiation,  $\lambda=1.5416$  Å). HR Evolution (Horiba) with 532 nm laser was used to collect Raman spectrum. In-situ Raman was recorded by jointing EL-CELL (Germany) and CHI 760E on the basis of ex-situ Raman. The specific surface area and pore volume were measured by BET (Quadrachrome evo 2QDS-MP-30). The sulfur content was acquired from TGA (Q50, USA) under nitrogen atmosphere. The elemental composition of the material was tested by XPS (ESCALAB 250Xi electron spectrometer, Thermo Scientific). UV-Vis spectra were obtained by a Shimadzu UV-2550 spectrophotometer.

## **2. Electrochemical measurements**

The electrochemical performances of MG-Co@S were explored by assembling CR2032 cells with Na metal as the counter electrode in the glove box. The working electrodes were fabricated by slurry coating method. In detail, MG-Co@S, polyvinylidene fluoride and acetylene black were mixed in the mass ratio of 8:1:1 with an appropriate amount N-methyl-2-pyrrolidone. After the slurry was uniformly coated on the aluminum foil, it was dried at 60 °C for 12 h under vacuum. The electrolyte was 1.0 M NaPF<sub>6</sub> dissolved in 1,3-dioxolane (DOL) and Diethylene glycol

dimethyl ether (DIGLYME) (1 : 1 Vol%). The separator was glass fiber membrane (Whatman GF/A). All specific capacity calculations were based on the mass of sulfur ( $1\text{ C} = 1675\text{ mA h g}^{-1}$ ). Cyclic voltammetry (CV) curves were recorded by CHI 760E (Shanghai Chenhua, China) with a scan rate of  $0.1\text{ mV s}^{-1}$ . The galvanostatic charge/discharge test was conducted by Land battery test system (CT2001A, Wuhan Kingnuo Electronic Co., China) in the voltage range of 0.5 - 2.8 V (vs. Na/Na<sup>+</sup>) after 8 hours of standing. EIS was tested by Zennium electrochemical workstation.

## Supplementary Figures

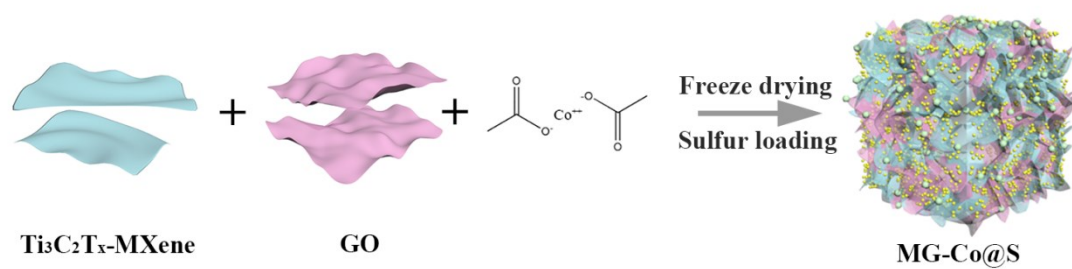

**Figure. S1** Illustration for the preparation of MG-Co@S composite.

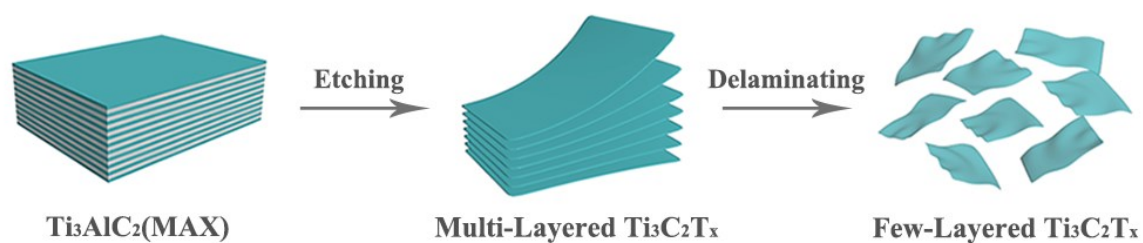

**Figure. S2** Illustration of the exfoliated process of the few-layered  $\text{Ti}_3\text{C}_2\text{T}_x$ .

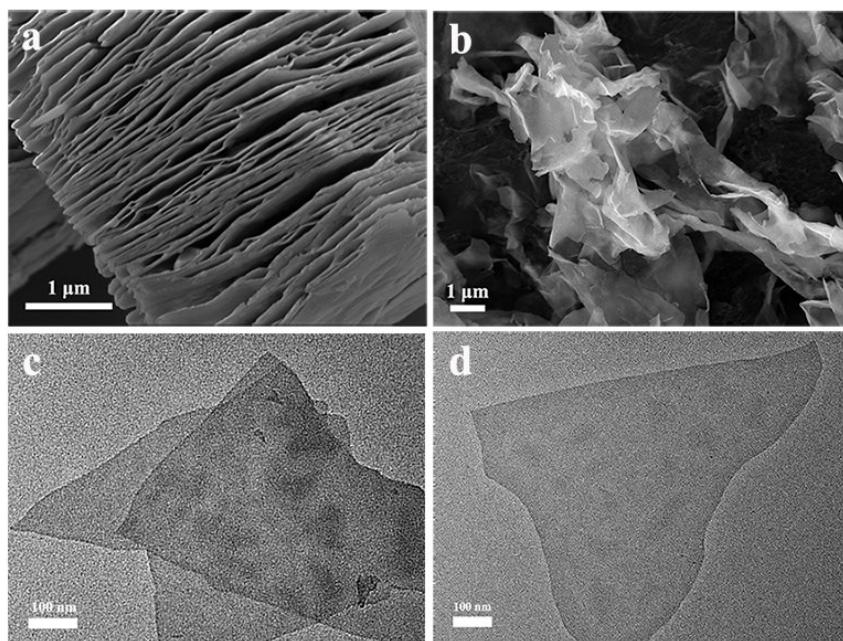

**Figure S3** (a) SEM image of  $\text{Ti}_3\text{C}_2\text{T}_x$  MXene before delamination; (b) SEM and (c-d) TEM images of  $\text{Ti}_3\text{C}_2\text{T}_x$  MXene flakes after delamination under ultrasonic.

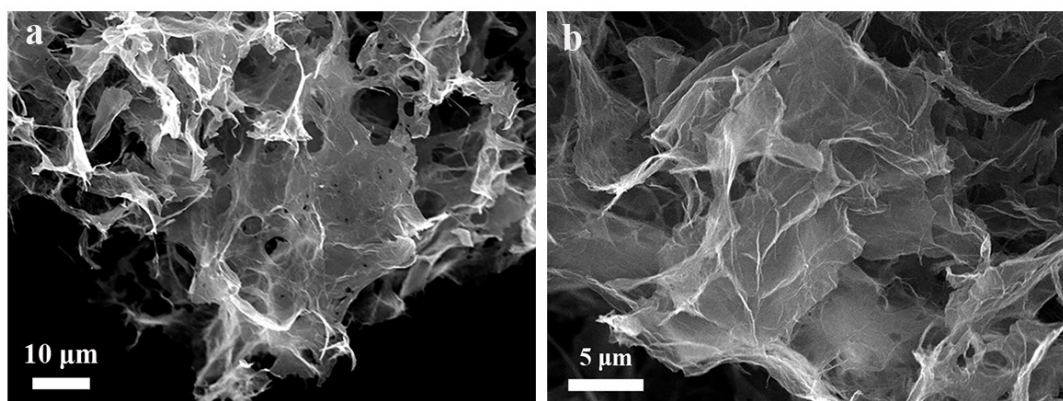

**Figure S4** (a) SEM images of MG.

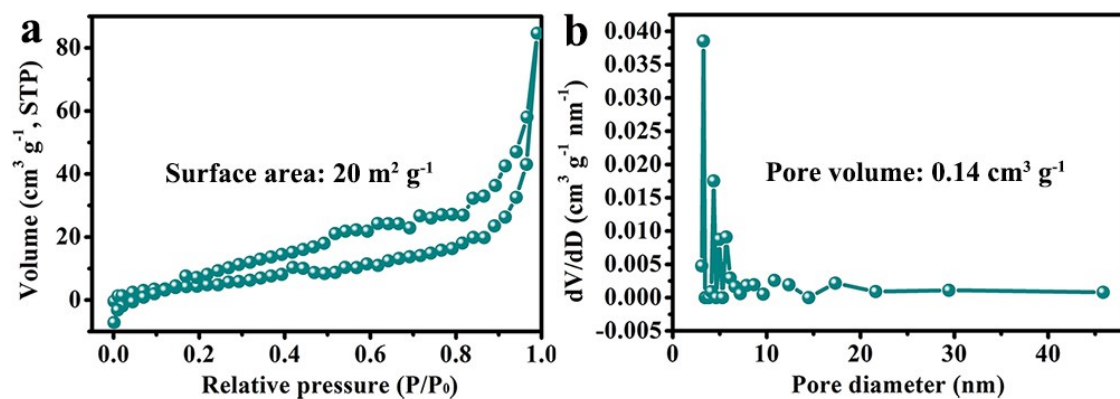

**Figure S5** (a)  $N_2$  adsorption and desorption curves and (b) pore size distribution curve of pure  $Ti_3C_2T_x$ .

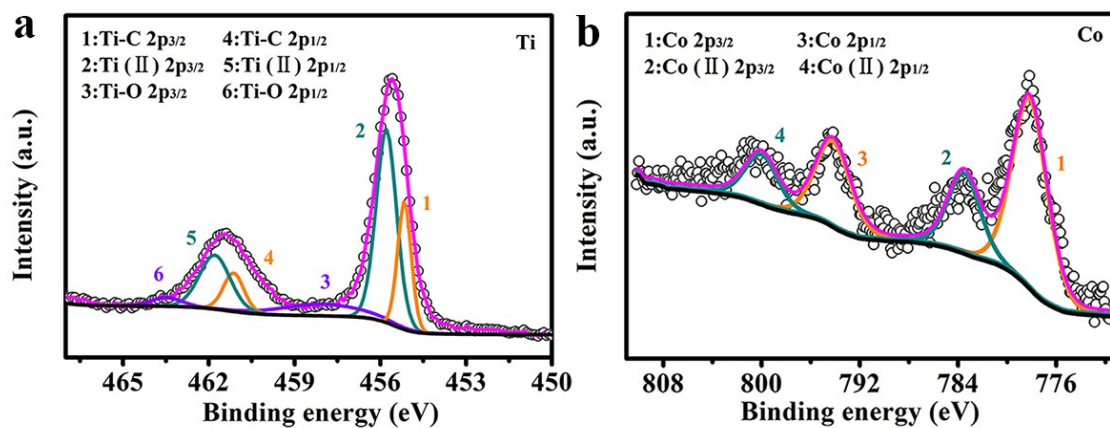

**Figure S6** XPS spectrum of (a) Ti 2p and (b) Co 2p for MG-Co composite.

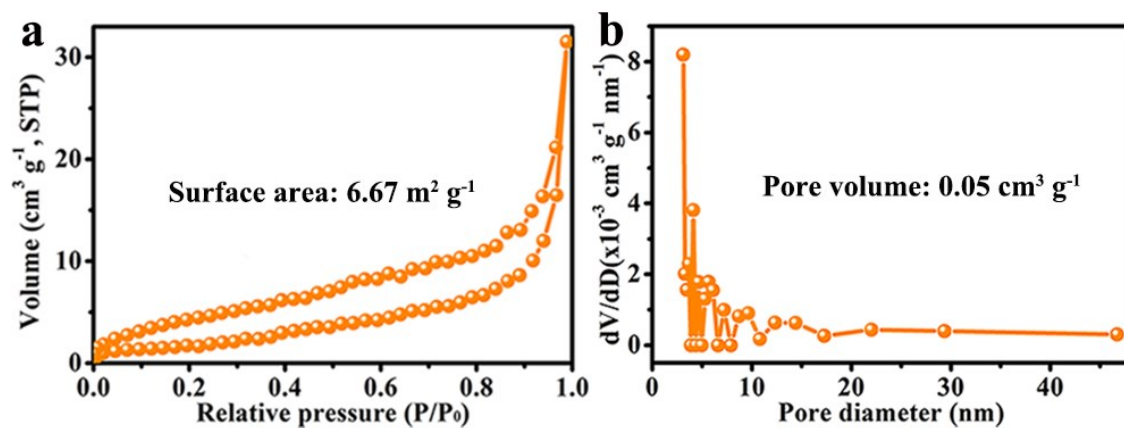

**Figure S7** (a)  $N_2$  adsorption and desorption curves and (b) pore size distribution curve

of MG-Co@S.

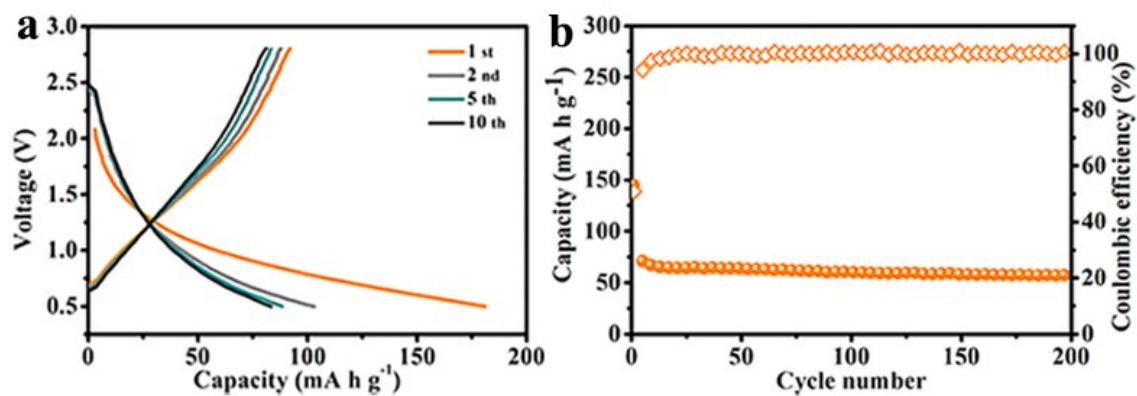

**Figure S8** (a) charge/discharge profiles and (b) cycling performance of MG-Co at 0.5

C.

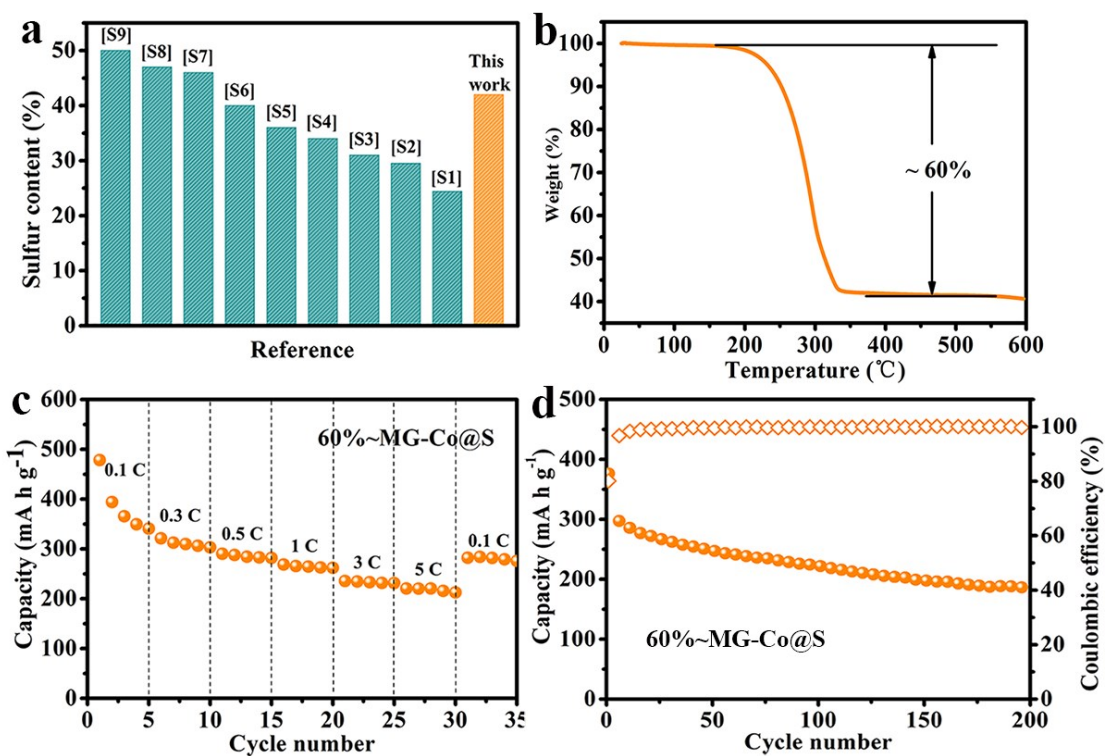

**Figure S9** (a) Comparison the sulfur content of this work with other literatures (b) TGA curve, (c) rate capability and (d) cycling performance at 0.5 C of MG-Co@S with higher sulfur loading.



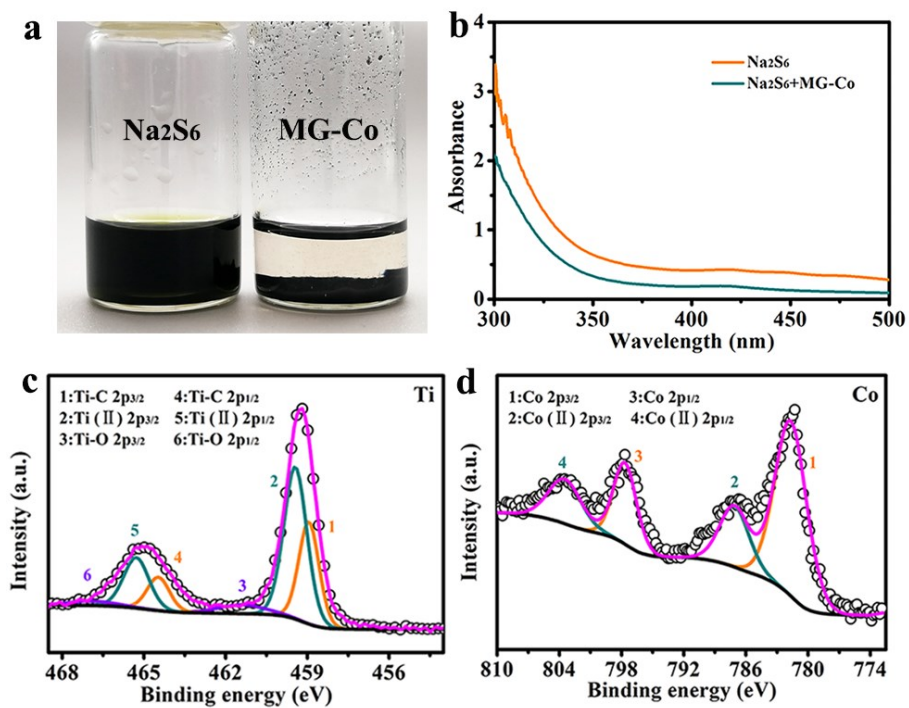

**Figure S10** (a) Polysulfides adsorption by MG-Co, (b) UV-vis absorption spectra of Na<sub>2</sub>S<sub>6</sub> solution before and after adding MG-Co, (c) the high-resolution XPS spectra of Ti 2p and Co 2p after adsorption of Na<sub>2</sub>S<sub>6</sub>.

**Table S1** The comparisons of the performance between different cathode materials for RT Na-S batteries.

| Materials             | S (wt%)   | Electrolyte                                                    | Rate                   | Cycles     | Final capacity (mA h g <sup>-1</sup> ) | Ref.             |
|-----------------------|-----------|----------------------------------------------------------------|------------------------|------------|----------------------------------------|------------------|
| <b>MG-Co@S</b>        | <b>42</b> | <b>1.0 M NaPF6<br/>in DOL:DIGLYME</b>                          | <b>0.5 C</b>           | <b>200</b> | <b>360</b>                             | <b>This work</b> |
| CFC/S                 | 24.4      | 1.5 M NaClO <sub>4</sub> and 0.2 M NaNO <sub>3</sub> in TEGDME | 0.1 C                  | 300        | 120                                    | S1               |
| S Nanosheets @Cu foam | 29.5      | 1.0 M NaClO <sub>4</sub> in PC:EC+5% FEC                       | 50 mA g <sup>-1</sup>  | 5          | 377                                    | S2               |
| cPANS                 | 31        | 0.8 M NaClO <sub>4</sub> in EC:DEC                             | 220 mA g <sup>-1</sup> | 500        | 150                                    | S3               |
| PCMs-S                | 34        | 1.0 M NaClO <sub>4</sub> in PC:EC+5% FEC                       | 100 mA g <sup>-1</sup> | 350        | 300                                    | S4               |
| S@Ni-NCFs             | 36        | 1.0 M NaClO <sub>4</sub> in TEGDME                             | 0.5 C                  | 270        | 233                                    | S5               |

|                        |    |                                             |                             |      |     |     |
|------------------------|----|---------------------------------------------|-----------------------------|------|-----|-----|
| rGO/VO <sub>2</sub> /S | 40 | 1.0 M NaClO <sub>4</sub><br>in TEGDME       | 2 C                         | 1000 | 156 | S6  |
| S@iMCHS                | 46 | 1.0 M NaClO <sub>4</sub><br>in PC:EC+5% FEC | 100 mA g <sup>-1</sup><br>1 | 200  | 292 | S7  |
| S@Co <sub>n</sub> -HC  | 47 | 1.0 M NaClO <sub>4</sub><br>in PC:EC+5% FEC | 100 mA g <sup>-1</sup><br>1 | 600  | 508 | S8  |
| cZIF-8/S               | 50 | 1.0 M NaClO <sub>4</sub><br>in TEGDME       | 0.2 C                       | 250  | 450 | S9  |
| HSMC-Cu-S              | 50 | 1.0 M NaClO <sub>4</sub><br>in EC:DMC       | 0.03 C                      | 110  | 610 | S10 |
| CNT@GNR/S              | 63 | 1.0 M NaClO <sub>4</sub> in<br>PC:EC        | 0.2 C                       | 300  | 350 | S11 |

## References

- [1] Q. Q. Lu, X. Y. Wang, J. Cao, C. Chen, K. N. Chen, Z. F. Zhao, Z. Q. Niu, J. Chen, *Energy Storage Mater.* 8 (2017) 77-84.
- [2] B. W. Zhang, Y. D. Liu, Y. X. Wang, L. Zhang, M. Z. Chen, W. H. Lai, S. L.

- Chou, H. K. Liu, S. X. Dou, ACS Appl. Mater. Interfaces 9 (2017) 24446-24450.
- [3] T. H. Hwang, D. S. Jung, J. S. Kim, B. G. Kim, J. W. Choi, Nano Lett. 13 (2013) 4532-4538.
- [4] L. Zhang, B. W. Zhang, Y. H. Dou, Y. X. Wang, M. Al-Mamun, X. L. Hu, H. Liu .ACS Appl. Mater. Interfaces 10 (2018) 20422.
- [5] B. S. Guo, W. Y. Du, T. T. Yang, J. H. Deng, D. Y. Liu, Y. R. Qi, J. Jiang, S. J. Bao, M. W. Xu, Adv. Sci. (2020) 1902617.
- [6] W. Y. Du, Y. K. Wu, T. T. Yang, B. S. Guo, D. Y. Liu, S. J. Bao, M. W. Xu, Chem. Eng. J. 379 (2020) 122359.
- [7] Y. X. Wang, J. P. Yang, W. H. Lai, S. L. Chou, Q. F. Gu, H. K. Liu, D. Y. Zhao, S. X. Dou, J. Am. Chem. Soc. 138 (2016) 16576-16579.
- [8] B. W. Zhang, T. Sheng, Y. D. Liu, Y. X. Wang, L. Zhang, W. H. Lai, L. Wang, J. P. Yang, Q. F. Gu, S. L. Chou, H. K. Liu, S. X. Dou, Nat. Commun. 9 (2018) 4082.
- [9] Y. M. Chen, W. F. Liang, S. Li, F. Zou, S. M. Bhaway, Z. Qiang, M. Gao, B. D. Vogt, Y. Zhu, J. Mater. Chem. A 4 (2016) 12471-12478.
- [10] S. Y. Zheng, P. Han, Z. Han, P. Li, H. J. Zhang, J. H. Yang, Adv. Energy Mater. (2014), 1400226.
- [11] A. P. V. K. Saroja, K. Muthusamy, R. Sundara, Adv. Mater. Interfaces. (2019), 1801873.
